# Supplementary material for: Neural mechanisms of social learning in the female mouse
Source: eLife. 2017 Jun 16;6:e25421. doi: 10.7554/eLife.25421 (PMC5531829; doi:10.7554/eLife.25421)
Supplement: Figure 1—source data 1. — These data can be opened with Microsoft Excel or with open-source alternatives such as OpenOffice. DOI: http://dx.doi.org/10.7554/eLife.25421.004 [file elife-25421-fig1-data1.xlsx]

## Sheet: Figure 1 suppl data
	Gao et. al.
	Neural mechanisms of social learning in the female mouse
	Figure 1 - source data
	Figure 1G
	Peak and final firing rates for MCs in MOB and AOB
	in response to 70 pA current injection
	MOB			AOB
	peak	final		peak	final
	40.8	11		6.13	2.38
	18.9	6.18		14.6	4.28
	23.9	10.5		8.81	1.39
	49.6	27.7		20	1.73
	62.1	17.4		10.3	2.9
	52.4	31		15.4	5.47
	50.9	14.8		5.71	0.012
	100	33.8		14.6	2.87
	31.2	11.6		9.19	1.69
