# Supplementary material for: Neural mechanisms of social learning in the female mouse
Source: eLife. 2017 Jun 16;6:e25421. doi: 10.7554/eLife.25421 (PMC5531829; doi:10.7554/eLife.25421)
Supplement: Figure 2—source data 1. — These data can be opened with Microsoft Excel or with open-source alternatives such as OpenOffice. DOI: http://dx.doi.org/10.7554/eLife.25421.007 [file elife-25421-fig2-data1.xlsx]

## Sheet: Figure 2 - source data
	Gao et. al.
	Neural mechanisms of social learning in the female mouse
	Figure 2 - source data
	Figure 2D				Figure 2F				Figure 2I				Figure 2K
	mean frequency of mIPSCs in MCs				mean amplitude of mIPSCs in MCs				mean amplitude of mEPSPs in GCs				mean frequency of mEPSCs in GCs
	naive	exposed	mated		naive	exposed	mated		naive	exposed	mated		naive	exposed	mated
	1.71667	1.78667	2.65333		50.4589	40.3769	48.2339		1.20436	0.852634	1.89881		3.78	1.32	9.74
	0.873333	1.11	2.67333		39.4101	78.1217	66.7484		0.785758	1.73485	1.74782		8.32	6.76	10.18
	0.536667	2.80333	3.70667		56.6835	49.2805	77.5182		0.877504	0.765418	1.62187		2.22	1.46	6.52
	0.78	1.00333	1.97667		52.6716	55.9674	49.2741		1.188	0.820706	1.53442		4.58	1.4	5.88
	0.853333	2.42	4.27		49.6142	77.4499	82.8496		0.977654	0.732171	0.694888		1.84	1.5	5.88
	0.6	0.733333	5.35333		59.7668	58.8651	91.9079		1.09278	1.11445	0.561708		5.8	10.4	2.96
	1.96333	1.29667	1.45		23.4766	63.3849	85.3514		1.60006	1.69831	0.939954		1	2.34	1.18
	1.3	0.793333	4.44		69.7891	56.6657	94.5468		0.971329	1.09393	2.39465		1.4	4.96	10.32
	0.59	1.45	1.99333		73.2044	81.9278	106.225		1.30626	1.93336	1.85614		6.96	3.9	5.92
	1.20667	0.69	0.943333		38.0154	40.285	39.4348		1.06421	0.980678	1.27011		1.36	3.64	5.68
	1.28	0.45	2.60667		54.9238	30.2696	38.4901		0.647199	2.30076	1.05991		1.9	3.64	11.7
	1.54667	2.29667	1.76333		58.7557	43.8922	51.4638		1.36101	1.46213	1.19515		4.04	3.82	7.38
	0.993333	0.863333	1.26		64.1093	29.9341	47.0499		0.825507	1.28745	1.41862		3.98	5.52	6.98
	2.53	1.14333	0.443333		55.8545	54.4451	33.0971		0.807067	1.09849	3.19095		4.9	2.32	10.82
	2.62667	1.50333	1.24333		62.4698	44.5842	75.3933		0.721816	1.00293	1.05258		4.48	2.26	1.96
	0.943333	0.783333			71.0058	67.9419			0.942497	0.750894	1.66918		11.4	0.4	6.96
	3.73333	0.583333			53.46	52.6457			1.96096	0.898213	2.02101		10.72	4.82	7.78
	2.6				88.5849					1.05521	1.05556			3.72	9.16
										0.913518	1.83732			3.38	11.16
											1.44585				8.28
											2.01107				11.98
											1.20461				9.4
											0.63231				1.38
											1.1625				4.2
											1.41718				1.54
											1.17619				0.94
											1.37019				8.96
											1.19078				2.16
											1.30944				3.66
											1.18444				7.58
