# Supplementary material for: Neural mechanisms of social learning in the female mouse
Source: eLife. 2017 Jun 16;6:e25421. doi: 10.7554/eLife.25421 (PMC5531829; doi:10.7554/eLife.25421)
Supplement: Figure 3—source data 1. — These data can be opened with Microsoft Excel or with open-source alternatives such as OpenOffice. DOI: http://dx.doi.org/10.7554/eLife.25421.012 [file elife-25421-fig3-data1.xlsx]

## Sheet: Figure 3 - source data
	Gao et. al.
	Neural mechanisms of social learning in the female mouse
	Figure 3 - source data
	Figure 3C			Figure 3D			Figure 3I			Figure 3J
	mean amplitude of sEPSP in GCs			mean frequency of sEPSP in GCs			mean amplitude of mIPSC in MCs			mean frequency of mIPSC in MCs
	GFP(-)	GFP(+)		GFP(-)	GFP(+)		GFP(-)	GFP(+)		GFP(-)	GFP(+)
	1.20461	1.27011		9.4	5.68		119.846	50.3419		2.49667	1.39333
	1.05556	0.561708		9.16	2.96		51.5011	59.1402		1.45667	2.99
	1.89881	0.939954		9.74	1.18		53.7496	50.7493		0.616667	1.49333
	2.02101	1.41718		7.78	1.54		61.228	65.3147		1.21	1.97667
	1.74782	1.44585		10.18	8.28		73.0143	63.7779		1.38	1.32
	0.63231	1.19078		1.38	2.16		52.6443			1.52667
	1.62187	1.05991		6.52	11.7		51.6674			1.52
	1.1625	1.19515		4.2	7.38		64.205			1.26333
	1.53442	1.37019		5.88	8.96
		1.05258			1.96
		1.41862			6.98
		1.18444			7.58
		3.19095			10.82
