# Supplementary material for: Neural mechanisms of social learning in the female mouse
Source: eLife. 2017 Jun 16;6:e25421. doi: 10.7554/eLife.25421 (PMC5531829; doi:10.7554/eLife.25421)
Supplement: Figure 4—source data 1. — These data can be opened with Microsoft Excel or with open-source alternatives such as OpenOffice. DOI: http://dx.doi.org/10.7554/eLife.25421.015 [file elife-25421-fig4-data1.xlsx]

## Sheet: Sheet1
	Gao et. al.
	Neural mechanisms of social learning in the female mouse
	Figure 4 - source data
	Figure 4C				Figure 4D				Figure 4F
	GC resting potential				GC current-firing function				GC resting potential, mated females
	naive	exposed	mated		naive	exposed	mated		GFP(-)	GFP(+)
	-75.8105	-80.2685	-59.0293		0.32	0.32	0.4381		-69.5005	-58.639
	-59.2228	-82.0158	-74.8984		0.27667	0.28667	0.28571		-55.3305	-55.8718
	-60.7525	-68.2438	-63.2394		0.25667	0.22262	0.22619		-59.0293	-63.958
	-65.1373	-66.7817	-63.7738		0.34857	0.27619	0.23929		-78.5021	-65.4621
	-69.3831	-57.5533	-55.8718		0.31667	0.23095	0.30298		-74.8984	-73.2864
	-69.3831	-76.2919	-55.8718		0.25714	0.38	0.2619		-69.1565	-76.4535
	-80.674	-76.0321	-63.958		0.315	0.15	0.35333		-63.2394	-55.7745
	-86.9206	-66.8361	-65.3717		0.27	0.25476	0.22381		-68.5672	-67.1596
	-73.0634	-69.0933	-69.5872		0.2	0.23714	0.37		-66.2244	-57.4697
	-73.9453	-57.406	-58.639		0.2267	0.16667	0.23214		-63.7738	-68.2747
	-73.5386	-71.1488	-55.7745		0.2116	0.25833	0.25667			-69.4709
	-68.697	-71.0207	-67.1596		0.33667	0.26071	0.25238			-70.453
	-71.5963	-75.7419	-69.4709		0.2267	0.25667	0.3819			-67.3573
	-72.6382	-71.8461	-70.453		0.21333	0.37381	0.31333
	-75.9723	-77.8679	-68.2747		0.33619	0.30667	0.375
	-75.1034	-77.1452	-75.1525		0.323	0.33333	0.33333
	-73.7421	-73.4512	-78.5021			0.33714	0.26476
		-59.7708	-55.3305			0.15714	0.36
		-71.079	-68.8692			0.34	0.22
			-73.2864				0.21
			-66.2244				0.37
			-71.7207				0.25667
			-69.5005				0.2881
			-69.1565				0.16786
			-68.5672				0.077143
			-65.4621				0.34286
			-67.3573				0.33333
			-62.6597				0.29881
			-57.4697				0.14444
			-76.4535
			-68.8008
