# Supplementary material for: Neural mechanisms of social learning in the female mouse
Source: eLife. 2017 Jun 16;6:e25421. doi: 10.7554/eLife.25421 (PMC5531829; doi:10.7554/eLife.25421)
Supplement: Figure 5—source data 1. — These data can be opened with Microsoft Excel or with open-source alternatives such as OpenOffice. DOI: http://dx.doi.org/10.7554/eLife.25421.017 [file elife-25421-fig5-data1.xlsx]

## Sheet: Sheet1
	Gao et. al.
	Neural mechanisms of social learning in the female mouse
	Figure 5 - source data
	Figure 5C			Figure 5D			Figure 5F
	MC peak firing rate			change in firing rate, trial 1			MC suppresion over 10 trials
				(final/peak)			(normalized spike count)
							naive group				mated group
							trial 1	trial 10			trial 1	trial 10
	Naïve	mated		Naïve	mated		total spikes	total spikes	normalized		total spikes	total spikes	normalized
	7.21523	11.8223		0.255955	0.124463		70	43	0.614286		87	0	0
	7.13848	11.2341		0.82885	0.170343		122	156	1.27869		82	21	0.256098
	11.3894	24.9757		0.297214	0.202281		129	143	1.10853		232	26	0.112069
	31.3604	6.15428		0.433599	1.71263		277	171	0.617329		58	23	0.396552
	23.6235	20.2797		0.38798	0.0996506		82	72	0.878049		256	148	0.578125
	6.87107	12.4838		0.527335	0.603333		154	137	0.88961		179	36	0.201117
	11.0513	11.8127		0.563777	0.38994		229	97	0.423581		145	84	0.57931
	20.8508	16.654		0.325501	0.441651		264	284	1.07576		235	243	1.03404
	26.1334	22.1434		0.338635	0.417528		53	19	0.358491		237	19	0.0801688
	4.37708	13.826		0.412471	0.21367						127	0	0
		24.8808			0.224471						206	155	0.752427
		30.5786			0.548413						432	324	0.75
		19.4713			0.134007						158	12	0.0759494
		11.7538			0.0832299						55	0	0
		22.4659			0.081926						152	80	0.526316
