# Supplementary material for: Neural mechanisms of social learning in the female mouse
Source: eLife. 2017 Jun 16;6:e25421. doi: 10.7554/eLife.25421 (PMC5531829; doi:10.7554/eLife.25421)
Supplement: Figure 6—source data 1. — These data can be opened with Microsoft Excel or with open-source alternatives such as OpenOffice. DOI: http://dx.doi.org/10.7554/eLife.25421.019 [file elife-25421-fig6-data1.xlsx]

## Sheet: Sheet1
	Gao et. al.
	Neural mechanisms of social learning in the female mouse
	Figure 6 - source data
	Figure 6C			Figure 6D			Figure 6F							Figure 6H
	MC peak firing rate			MC total spike count			MC suppression							MC suppression
														(trial 10 / trial 1)
							trial 1, GFP(-)	trial 10, GFP(-)		trial 1, GFP(+)	trial 10, GFP(+)
	GFP(-)	GFP(+)		GFP(-)	GFP(+)		total spikes	total spikes	normalized	total spikes	total spikes	normalized		GFP(-)	GFP(+)
	28.9956	24.4665		295	176		295	496	1.68136	176	0	0		1.68136	0
	14.6826	21.8368		209	123		209	245	1.17225	123	6	0.0487805		1.17225	0.0487805
	16.3552	25.6593		141	154		141	183	1.29787	154	0	0		1.29787	0
	19.9414	20.4943		223	235		223	355	1.59193	235	264	1.1234		1.59193	1.1234
	16.3895	1.90689		172	4		172	94	0.546512	4	0	0		0.546512	0
	7.42554	7.29614		39	48		39	22	0.564103	48	3	0.0625		0.564103	0.0625
	2.58191	22.7343		5	271		5	6	1.2	271	100	0.369004		1.2	0.369004
		14.9367			125					125	27	0.216			0.216
		10.2877			69					69	0	0			0
		18.3295			215					215	196	0.911628			0.911628
		9.91816			40					40	26	0.65			0.65
