# Supplementary material for: Neural mechanisms of social learning in the female mouse
Source: eLife. 2017 Jun 16;6:e25421. doi: 10.7554/eLife.25421 (PMC5531829; doi:10.7554/eLife.25421)
Supplement: Figure 7—source data 1. — These data can be opened with Microsoft Excel or with open-source alternatives such as OpenOffice. DOI: http://dx.doi.org/10.7554/eLife.25421.023 [file elife-25421-fig7-data1.xlsx]

## Sheet: Sheet1
	Gao et. al.
	Neural mechanisms of social learning in the female mouse
	Figure 7 - source data
	Figure 7C						Figure 7D
	MC initial resting potential						MC change in resting potential
	Arc-GFP, 'random' MCs		mated Fos-GFP females				trial 10 relative to trial 1
	naïve	mated	GFP(-)	GFP(+)			GFP(-)	GFP(+)
	-56.2606	-57.3943	-54.9707	-54.6169			1.109	-4.7428
	-56.3758	-52.2536	-56.9523	-55.5364			-2.0389	-4.7049
	-54.5572	-56.432	-49.3095	-51.663			-0.2609	-6.4268
	-56.8995	-54.171	-54.6644	-52.1726			1.7114	-1.6988
	-55.8561	-57.2436	-53.4687	-58.1067			-1.94	-3.4236
	-63.7285	-55.1925	-53.3471	-55.5087			-0.9616	-0.9213
	-62.9453	-54.8451	-62.0339	-58			0.6975	-3.6402
	-59.2195	-57.8027		-53.3119				-2.6789
	-53.9274	-56.0392		-55.1178				-3.6621
	-60.5924	-54.5948		-44.4692				-3.3699
		-61.7112		-53.9402				-1.2191
		-59.4683
		-58.0611
		-61.8089
		-53.6319
